# Supplementary material for: Highly efficient transgenesis mediated by Tip100 transposon system in medaka
Source: Transgenic Res. 2025 Oct 9;34(1):46. doi: 10.1007/s11248-025-00466-5 (PMC12511174; doi:10.1007/s11248-025-00466-5)
Supplement: Supplementary file 2 — Supplementary file2 (XLSX 10 KB) [file 11248_2025_466_MOESM2_ESM.xlsx]

## Sheet: Sheet1
Primer Name	Sequence
pCS2-NLS-Tip100-Fw1	TTTGCAGGATCCATGGGTCCTCCAGAGAAGAAGCGTAAGGTAGAAATGAAAAAGACACAAAAAATAGA
pCS2-Tip100-Rv1	GTTCTAGAGGCTCGACTAAAATTTAGACCGTCTCTC
Tip100-5FW-SpeI	AGAACTAGTCAGGGGCGGAGGCACATA
Tip100-5RV-EcoRI	ATTGAATTCATTTAAATTCTAGCAAATCTTATAG
Tip100-3FW-SalI	TATGTCGACGCATCAACATTGAAAGAGGGCA
Tip100-3RV-KpnI	CTGGGTACCCAGGGGCGGAGCCAGGATT
Tip100-R100-3FW-actb	AGCGCATATGTCGACATGTATTTTGGAACATGTTAAATG
Tip100-L100-5RV-actb	ACTGTAATTGAATTCCCTATTGCCTAATAGGCTATACTAAT
actb4kpro-5FW	GAATTCAATTACAGTGGTCATGA
SV40pA-3RV	GTCGACATATGCGCTTACA
Tip100-R100-3FW-IF	CCATATGATGTATTTTGGAACATGTTAAATGA
Tip100-L100-5RV-IF	CCTATTGCCTAATAGGCTATACTAATTGCA
olvas-3FW-Tip100	CTATTAGGCAATAGGCTCGAGATCCAATAGAATGA
olvas-5RV-Tip100	AAATACATCATATGGTGCACTCTCAGTA
5cis-inverse-FW1	AATGCATGCAATTAGTATAGCC
5cis-inverse-RV1	CCCTGCATATAATATGTGCC
5cis-inverse-FW2	AGGCAATAGGCTCGAGATCC
5cis-inverse-RV2	TATAATATGTGCCTCCGCCC
5cis-check-RV	AGATTAATGGCTTCACTTCC
3cis-check-FW	AAATTGAATTCCTACTAGTCGG
5cis-#2-check-FW	GGTAAGTCAGTTGCTACTATTAACC
3cis-#2-check-RV	ATGGTGTATGTAATCTCGGAG
5cis-#4-check-FW	GCAGCCTTTTCTAATCTACC
3cis-#4-check-RV	TTTGTTCCTTTCACTGTCTATG
5cis-#10-check-FW	AAGAGCTTGAAAATGCTGTC
3cis-#10-check-RV	GGATTCTTTTGCTCACTGTG
